# Supplementary material
Source: Springer Nature journal article supplement (https://www.springermedizin.de/resource/supplementary/12891_2012_1856_MOESM1_ESM.pdf/9508652)
Supplement: MOESM1 [file 9508652]

NCOR

Standard Data Collection Tool

Australian Version

Osteopath Name or code: .....  
 (Optional, see Plain Language Statement)

| <b>Part 1: PATIENT FORM – Initial consultation details</b><br><i>To be completed by the osteopath</i>                                                                                                                                                                                                                                                                                                              |                                                                                                                                                                                                                                                                                                                                                                                                                                                                                                                      |
|--------------------------------------------------------------------------------------------------------------------------------------------------------------------------------------------------------------------------------------------------------------------------------------------------------------------------------------------------------------------------------------------------------------------|----------------------------------------------------------------------------------------------------------------------------------------------------------------------------------------------------------------------------------------------------------------------------------------------------------------------------------------------------------------------------------------------------------------------------------------------------------------------------------------------------------------------|
| <b>1. Date of first appointment</b>                                                                                                                                                                                                                                                                                                                                                                                | <b>2. Gender:</b> Male <input type="checkbox"/> Female <input type="checkbox"/>                                                                                                                                                                                                                                                                                                                                                                                                                                      |
| <b>3. Postcode:</b>                                                                                                                                                                                                                                                                                                                                                                                                | <b>4. What is the patient's age?</b>                                                                                                                                                                                                                                                                                                                                                                                                                                                                                 |
| <b>5. What is the patient's height?</b>                                                                                                                                                                                                                                                                                                                                                                            | <b>6. What is the patient's weight?</b>                                                                                                                                                                                                                                                                                                                                                                                                                                                                              |
| <b>7. What is the patient's main occupation?</b><br><br>Not applicable <input type="checkbox"/>                                                                                                                                                                                                                                                                                                                    | <b>8. How would you describe the patient's current work status?</b> <i>(tick as appropriate)</i><br><br><input type="checkbox"/> Working full time (employed)<br><input type="checkbox"/> Working full time (self-employed)<br><input type="checkbox"/> Working part time (employed)<br><input type="checkbox"/> Working part time (self-employed)<br><input type="checkbox"/> Not currently employed<br><input type="checkbox"/> Retired<br><input type="checkbox"/> Student<br><input type="checkbox"/> Pre-school |
| <b>9. Does the patient receive disability allowance?</b><br><br>Yes <input type="checkbox"/> No <input type="checkbox"/> Not applicable <input type="checkbox"/>                                                                                                                                                                                                                                                   |                                                                                                                                                                                                                                                                                                                                                                                                                                                                                                                      |
| <b>10. Who referred the patient to this practice?*</b><br><br><input type="checkbox"/> Patient <input type="checkbox"/> Another healthcare practitioner<br><input type="checkbox"/> GP <input type="checkbox"/> Solicitor<br><input type="checkbox"/> Insurance company <input type="checkbox"/> TAC<br><input type="checkbox"/> Employer <input type="checkbox"/> EPC Plan<br><input type="checkbox"/> Work cover |                                                                                                                                                                                                                                                                                                                                                                                                                                                                                                                      |
| <b>11. Has the patient ever had any osteopathic treatment before?</b> <input type="checkbox"/> yes <input type="checkbox"/> no                                                                                                                                                                                                                                                                                     | <b>12. How long did the patient have to wait for the <u>first appointment</u> to be offered?</b><br><br><input type="checkbox"/> Same day<br><input type="checkbox"/> 2-3 days<br><input type="checkbox"/> 4-7 days<br><input type="checkbox"/> 8 days or more                                                                                                                                                                                                                                                       |
| <b>13. How many times has the patient visited their GP about this condition prior to coming to here?</b><br><br>times                                                                                                                                                                                                                                                                                              |                                                                                                                                                                                                                                                                                                                                                                                                                                                                                                                      |
| <b>14. How physically demanding is the patient's occupation?</b><br><br><input type="checkbox"/> sedentary<br><input type="checkbox"/> light<br><input type="checkbox"/> moderate<br><input type="checkbox"/> strenuous<br><input type="checkbox"/> not applicable                                                                                                                                                 | <b>15. How strenuous are the patient's leisure time activities?</b> (see examples below)<br><br><input type="checkbox"/> sedentary<br><input type="checkbox"/> light<br><input type="checkbox"/> moderate<br><input type="checkbox"/> strenuous<br><input type="checkbox"/> not applicable                                                                                                                                                                                                                           |
| <b>EXAMPLE LEISURE ACTIVITIES</b><br>Sedentary: handicrafts, cinema<br>Light: badminton, bowling, light gardening, walking (including to and from shops)<br>Moderate: jogging, swimming, moderate gardening<br>Strenuous: basketball, competitive cycling, competitive swimming, football, squash, heavy gardening                                                                                                 |                                                                                                                                                                                                                                                                                                                                                                                                                                                                                                                      |

|                                                                                                                                                                                                                                                                                                                                                                                                                                                                                                                                                                                                                                                                                                                                                                                                                                                                                                                                                                                                                                                                                                                                                                                                                                                                                                                                                                                                                                                                                                                                                                                                                                                                                                                                                                                                                                                                                                                                                                                                                                                                                                                                         |                                                                                                                                                                                                                                                                                                                                                                                                                                                                                                                                                                                                                                                                                                                                                                                                                                                                     |                                                                                                                                                                                                                                                                                                                                                                                                                                                                                                                                                                                                                                                                                                                                                                                                                                                                                                                                                                                                                                                           |                                                                                                                                                                                                                                                                                                                                                                                                                                                                                                                                                                                                                                                                                                                                                                                                                                                                     |
|-----------------------------------------------------------------------------------------------------------------------------------------------------------------------------------------------------------------------------------------------------------------------------------------------------------------------------------------------------------------------------------------------------------------------------------------------------------------------------------------------------------------------------------------------------------------------------------------------------------------------------------------------------------------------------------------------------------------------------------------------------------------------------------------------------------------------------------------------------------------------------------------------------------------------------------------------------------------------------------------------------------------------------------------------------------------------------------------------------------------------------------------------------------------------------------------------------------------------------------------------------------------------------------------------------------------------------------------------------------------------------------------------------------------------------------------------------------------------------------------------------------------------------------------------------------------------------------------------------------------------------------------------------------------------------------------------------------------------------------------------------------------------------------------------------------------------------------------------------------------------------------------------------------------------------------------------------------------------------------------------------------------------------------------------------------------------------------------------------------------------------------------|---------------------------------------------------------------------------------------------------------------------------------------------------------------------------------------------------------------------------------------------------------------------------------------------------------------------------------------------------------------------------------------------------------------------------------------------------------------------------------------------------------------------------------------------------------------------------------------------------------------------------------------------------------------------------------------------------------------------------------------------------------------------------------------------------------------------------------------------------------------------|-----------------------------------------------------------------------------------------------------------------------------------------------------------------------------------------------------------------------------------------------------------------------------------------------------------------------------------------------------------------------------------------------------------------------------------------------------------------------------------------------------------------------------------------------------------------------------------------------------------------------------------------------------------------------------------------------------------------------------------------------------------------------------------------------------------------------------------------------------------------------------------------------------------------------------------------------------------------------------------------------------------------------------------------------------------|---------------------------------------------------------------------------------------------------------------------------------------------------------------------------------------------------------------------------------------------------------------------------------------------------------------------------------------------------------------------------------------------------------------------------------------------------------------------------------------------------------------------------------------------------------------------------------------------------------------------------------------------------------------------------------------------------------------------------------------------------------------------------------------------------------------------------------------------------------------------|
| <p><b>16. How many weeks has the patient had this current problem?</b></p> <p><input type="checkbox"/> less than 1 week<br/> <input type="checkbox"/> 1-2 weeks<br/> <input type="checkbox"/> 3-4 weeks<br/> <input type="checkbox"/> 5-6 weeks<br/> <input type="checkbox"/> 6-12 weeks<br/> <input type="checkbox"/> 13 or more weeks</p>                                                                                                                                                                                                                                                                                                                                                                                                                                                                                                                                                                                                                                                                                                                                                                                                                                                                                                                                                                                                                                                                                                                                                                                                                                                                                                                                                                                                                                                                                                                                                                                                                                                                                                                                                                                             | <p><b>17. How many weeks has the patient been off work with this current problem?</b></p> <p><input type="checkbox"/> less than 1 week<br/> <input type="checkbox"/> 1 week<br/> <input type="checkbox"/> 2 weeks<br/> <input type="checkbox"/> 3 weeks<br/> <input type="checkbox"/> 4 weeks<br/> <input type="checkbox"/> 5 weeks or more<br/> <input type="checkbox"/> not applicable</p>                                                                                                                                                                                                                                                                                                                                                                                                                                                                        |                                                                                                                                                                                                                                                                                                                                                                                                                                                                                                                                                                                                                                                                                                                                                                                                                                                                                                                                                                                                                                                           |                                                                                                                                                                                                                                                                                                                                                                                                                                                                                                                                                                                                                                                                                                                                                                                                                                                                     |
| <p><b>18. How did the patient hear about this practice?*</b><br/>(tick all that apply)</p> <p><input type="checkbox"/> Word of mouth/recommendation<br/> <input type="checkbox"/> Local advert<br/> <input type="checkbox"/> Yellow pages<br/> <input type="checkbox"/> I live nearby<br/> <input type="checkbox"/> From a healthcare practitioner<br/> <input type="checkbox"/> Internet search<br/> <input type="checkbox"/> Other, please specify</p>                                                                                                                                                                                                                                                                                                                                                                                                                                                                                                                                                                                                                                                                                                                                                                                                                                                                                                                                                                                                                                                                                                                                                                                                                                                                                                                                                                                                                                                                                                                                                                                                                                                                                | <p><b>19. Why did the patient decide to have osteopathy?*</b> (tick all that apply)*</p> <p><input type="checkbox"/> Personal recommendation or referral<br/> <input type="checkbox"/> Personal research<br/> <input type="checkbox"/> Failure of previous treatment<br/> <input type="checkbox"/> Previous experience of osteopathic treatment<br/> <input type="checkbox"/> Desire to have osteopathic treatment<br/> <input type="checkbox"/> Wanted a form of manual or hands on treatment<br/> <input type="checkbox"/> Wanted to have drug-free treatment<br/> <input type="checkbox"/> Other, please specify</p>                                                                                                                                                                                                                                             |                                                                                                                                                                                                                                                                                                                                                                                                                                                                                                                                                                                                                                                                                                                                                                                                                                                                                                                                                                                                                                                           |                                                                                                                                                                                                                                                                                                                                                                                                                                                                                                                                                                                                                                                                                                                                                                                                                                                                     |
| <p><b>20. Is the patient on a Hospital waiting list for treatment for this condition?*</b></p> <p><input type="checkbox"/> yes    <input type="checkbox"/> no</p>                                                                                                                                                                                                                                                                                                                                                                                                                                                                                                                                                                                                                                                                                                                                                                                                                                                                                                                                                                                                                                                                                                                                                                                                                                                                                                                                                                                                                                                                                                                                                                                                                                                                                                                                                                                                                                                                                                                                                                       | <p><b>21. How long has the patient been waiting for Hospital treatment for this condition?*</b></p> <p>_____Weeks    Not applicable    <input type="checkbox"/></p>                                                                                                                                                                                                                                                                                                                                                                                                                                                                                                                                                                                                                                                                                                 |                                                                                                                                                                                                                                                                                                                                                                                                                                                                                                                                                                                                                                                                                                                                                                                                                                                                                                                                                                                                                                                           |                                                                                                                                                                                                                                                                                                                                                                                                                                                                                                                                                                                                                                                                                                                                                                                                                                                                     |
| <p><b>22. Has the patient had previous Medical/Hospital treatment for <u>this</u> episode of this condition?*</b></p> <p>Yes   <input type="checkbox"/>   No    <input type="checkbox"/></p> <p><b>If yes, has this included:</b> <i>Tick all that apply</i></p> <p><input type="checkbox"/> Imaging e.g. an X-Ray or scan                      <input type="checkbox"/> Medication<br/> <input type="checkbox"/> Hospital outpatient treatment                      <input type="checkbox"/> Hospital inpatient treatment</p>                                                                                                                                                                                                                                                                                                                                                                                                                                                                                                                                                                                                                                                                                                                                                                                                                                                                                                                                                                                                                                                                                                                                                                                                                                                                                                                                                                                                                                                                                                                                                                                                          |                                                                                                                                                                                                                                                                                                                                                                                                                                                                                                                                                                                                                                                                                                                                                                                                                                                                     |                                                                                                                                                                                                                                                                                                                                                                                                                                                                                                                                                                                                                                                                                                                                                                                                                                                                                                                                                                                                                                                           |                                                                                                                                                                                                                                                                                                                                                                                                                                                                                                                                                                                                                                                                                                                                                                                                                                                                     |
| <p><b>23. How would you classify the ethnic background of this patient?</b></p> <table border="0"> <tr> <td data-bbox="177 1323 796 2096"> <p><b>Oceanian</b></p> <p><input type="checkbox"/> Australian<br/> <input type="checkbox"/> Australian Aboriginal<br/> <input type="checkbox"/> Torres Straight Islander<br/> <input type="checkbox"/> Australian South Sea Islander<br/> <input type="checkbox"/> New Zealander<br/> <input type="checkbox"/> Maori<br/> <input type="checkbox"/> Other.....</p> <p><b>North West European</b></p> <p><input type="checkbox"/> English<br/> <input type="checkbox"/> Scottish<br/> <input type="checkbox"/> Irish<br/> <input type="checkbox"/> Dutch<br/> <input type="checkbox"/> German<br/> <input type="checkbox"/> Other .....</p> <p><b>Southern and Eastern European</b></p> <p><input type="checkbox"/> Italian<br/> <input type="checkbox"/> Spanish<br/> <input type="checkbox"/> Greek<br/> <input type="checkbox"/> Croatian<br/> <input type="checkbox"/> Other.....</p> <p><b>North African and Middle Eastern</b></p> <p><input type="checkbox"/> Arab<br/> <input type="checkbox"/> Jewish<br/> <input type="checkbox"/> Other.....</p> </td> <td data-bbox="798 1323 1415 2096"> <p><b>South-East Asian</b></p> <p><input type="checkbox"/> Vietnamese<br/> <input type="checkbox"/> Indonesian<br/> <input type="checkbox"/> Other.....</p> <p><b>North-East Asian</b></p> <p><input type="checkbox"/> Chinese<br/> <input type="checkbox"/> Other.....</p> <p><b>Southern and Central Asian</b></p> <p><input type="checkbox"/> Indian<br/> <input type="checkbox"/> Pakistani<br/> <input type="checkbox"/> Other.....</p> <p><b>People of the Americas</b></p> <p><input type="checkbox"/> North American<br/> <input type="checkbox"/> Central American<br/> <input type="checkbox"/> South American<br/> <input type="checkbox"/> Other.....</p> <p><b>Sub-Saharan African</b></p> <p><input type="checkbox"/> Central and West African<br/> <input type="checkbox"/> Southern and East African</p> <p><input type="checkbox"/> Other.....</p> </td> </tr> </table> |                                                                                                                                                                                                                                                                                                                                                                                                                                                                                                                                                                                                                                                                                                                                                                                                                                                                     | <p><b>Oceanian</b></p> <p><input type="checkbox"/> Australian<br/> <input type="checkbox"/> Australian Aboriginal<br/> <input type="checkbox"/> Torres Straight Islander<br/> <input type="checkbox"/> Australian South Sea Islander<br/> <input type="checkbox"/> New Zealander<br/> <input type="checkbox"/> Maori<br/> <input type="checkbox"/> Other.....</p> <p><b>North West European</b></p> <p><input type="checkbox"/> English<br/> <input type="checkbox"/> Scottish<br/> <input type="checkbox"/> Irish<br/> <input type="checkbox"/> Dutch<br/> <input type="checkbox"/> German<br/> <input type="checkbox"/> Other .....</p> <p><b>Southern and Eastern European</b></p> <p><input type="checkbox"/> Italian<br/> <input type="checkbox"/> Spanish<br/> <input type="checkbox"/> Greek<br/> <input type="checkbox"/> Croatian<br/> <input type="checkbox"/> Other.....</p> <p><b>North African and Middle Eastern</b></p> <p><input type="checkbox"/> Arab<br/> <input type="checkbox"/> Jewish<br/> <input type="checkbox"/> Other.....</p> | <p><b>South-East Asian</b></p> <p><input type="checkbox"/> Vietnamese<br/> <input type="checkbox"/> Indonesian<br/> <input type="checkbox"/> Other.....</p> <p><b>North-East Asian</b></p> <p><input type="checkbox"/> Chinese<br/> <input type="checkbox"/> Other.....</p> <p><b>Southern and Central Asian</b></p> <p><input type="checkbox"/> Indian<br/> <input type="checkbox"/> Pakistani<br/> <input type="checkbox"/> Other.....</p> <p><b>People of the Americas</b></p> <p><input type="checkbox"/> North American<br/> <input type="checkbox"/> Central American<br/> <input type="checkbox"/> South American<br/> <input type="checkbox"/> Other.....</p> <p><b>Sub-Saharan African</b></p> <p><input type="checkbox"/> Central and West African<br/> <input type="checkbox"/> Southern and East African</p> <p><input type="checkbox"/> Other.....</p> |
| <p><b>Oceanian</b></p> <p><input type="checkbox"/> Australian<br/> <input type="checkbox"/> Australian Aboriginal<br/> <input type="checkbox"/> Torres Straight Islander<br/> <input type="checkbox"/> Australian South Sea Islander<br/> <input type="checkbox"/> New Zealander<br/> <input type="checkbox"/> Maori<br/> <input type="checkbox"/> Other.....</p> <p><b>North West European</b></p> <p><input type="checkbox"/> English<br/> <input type="checkbox"/> Scottish<br/> <input type="checkbox"/> Irish<br/> <input type="checkbox"/> Dutch<br/> <input type="checkbox"/> German<br/> <input type="checkbox"/> Other .....</p> <p><b>Southern and Eastern European</b></p> <p><input type="checkbox"/> Italian<br/> <input type="checkbox"/> Spanish<br/> <input type="checkbox"/> Greek<br/> <input type="checkbox"/> Croatian<br/> <input type="checkbox"/> Other.....</p> <p><b>North African and Middle Eastern</b></p> <p><input type="checkbox"/> Arab<br/> <input type="checkbox"/> Jewish<br/> <input type="checkbox"/> Other.....</p>                                                                                                                                                                                                                                                                                                                                                                                                                                                                                                                                                                                                                                                                                                                                                                                                                                                                                                                                                                                                                                                                               | <p><b>South-East Asian</b></p> <p><input type="checkbox"/> Vietnamese<br/> <input type="checkbox"/> Indonesian<br/> <input type="checkbox"/> Other.....</p> <p><b>North-East Asian</b></p> <p><input type="checkbox"/> Chinese<br/> <input type="checkbox"/> Other.....</p> <p><b>Southern and Central Asian</b></p> <p><input type="checkbox"/> Indian<br/> <input type="checkbox"/> Pakistani<br/> <input type="checkbox"/> Other.....</p> <p><b>People of the Americas</b></p> <p><input type="checkbox"/> North American<br/> <input type="checkbox"/> Central American<br/> <input type="checkbox"/> South American<br/> <input type="checkbox"/> Other.....</p> <p><b>Sub-Saharan African</b></p> <p><input type="checkbox"/> Central and West African<br/> <input type="checkbox"/> Southern and East African</p> <p><input type="checkbox"/> Other.....</p> |                                                                                                                                                                                                                                                                                                                                                                                                                                                                                                                                                                                                                                                                                                                                                                                                                                                                                                                                                                                                                                                           |                                                                                                                                                                                                                                                                                                                                                                                                                                                                                                                                                                                                                                                                                                                                                                                                                                                                     |

|                                                                                                                                                                                                                                                                                                                                                                                                                                                                                                                                                                                                                                                                                                                                                                                                                                                                                                                                                                                                                                                                                                                                                                                                                                                                                                                                                                                                                                                                                                                                                                                          |                                                                                                                                                                                                                                                                                                                                                                                                                                                                                                                                                                                                                                                                          |                                                                                                                                                                                                                                                                                                                                                                                                                                                                                                                                                                                                  |                                                                                                                                                                                                                                                                                                                                                                                                                                                                                                                                                                                                                                                                          |  |
|------------------------------------------------------------------------------------------------------------------------------------------------------------------------------------------------------------------------------------------------------------------------------------------------------------------------------------------------------------------------------------------------------------------------------------------------------------------------------------------------------------------------------------------------------------------------------------------------------------------------------------------------------------------------------------------------------------------------------------------------------------------------------------------------------------------------------------------------------------------------------------------------------------------------------------------------------------------------------------------------------------------------------------------------------------------------------------------------------------------------------------------------------------------------------------------------------------------------------------------------------------------------------------------------------------------------------------------------------------------------------------------------------------------------------------------------------------------------------------------------------------------------------------------------------------------------------------------|--------------------------------------------------------------------------------------------------------------------------------------------------------------------------------------------------------------------------------------------------------------------------------------------------------------------------------------------------------------------------------------------------------------------------------------------------------------------------------------------------------------------------------------------------------------------------------------------------------------------------------------------------------------------------|--------------------------------------------------------------------------------------------------------------------------------------------------------------------------------------------------------------------------------------------------------------------------------------------------------------------------------------------------------------------------------------------------------------------------------------------------------------------------------------------------------------------------------------------------------------------------------------------------|--------------------------------------------------------------------------------------------------------------------------------------------------------------------------------------------------------------------------------------------------------------------------------------------------------------------------------------------------------------------------------------------------------------------------------------------------------------------------------------------------------------------------------------------------------------------------------------------------------------------------------------------------------------------------|--|
| <p><b>24. How long has the patient had their current symptoms with this episode?</b></p>                                                                                                                                                                                                                                                                                                                                                                                                                                                                                                                                                                                                                                                                                                                                                                                                                                                                                                                                                                                                                                                                                                                                                                                                                                                                                                                                                                                                                                                                                                 | <p><b>25. Type of onset of symptoms?</b> <i>Tick all that apply</i></p> <p><input type="checkbox"/> Acute/sudden onset (of unknown origin)<br/> <input type="checkbox"/> Traumatic onset (of known origin)<br/> <input type="checkbox"/> Slow/insidious onset<br/> <input type="checkbox"/> Recurring problem</p>                                                                                                                                                                                                                                                                                                                                                        |                                                                                                                                                                                                                                                                                                                                                                                                                                                                                                                                                                                                  |                                                                                                                                                                                                                                                                                                                                                                                                                                                                                                                                                                                                                                                                          |  |
| <p><b>26. Symptom areas:</b> Please record up to three predominant symptom areas in order of priority</p> <p style="text-align: center;">1. <input type="checkbox"/>                      2. <input type="checkbox"/>                      3. <input type="checkbox"/></p> <table style="width: 100%; border: none;"> <tr> <td style="width: 33%; vertical-align: top;"> <p>1 Head/facial area<br/> 2 Temporo-mandibular<br/> 3 Neck<br/> 4 Shoulder<br/> 5 Upper arm<br/> 6 Elbow<br/> 7 Forearm<br/> 8 Wrist<br/> 9 Hand<br/> 10 Thoracic spine<br/> 11 Rib cage</p> </td> <td style="width: 33%; vertical-align: top;"> <p>12 Lumbar<br/> 13 Sacroiliac/pelvis/groin<br/> 14 Gluteal region<br/> 15 Hip<br/> 16 Thigh/upper leg<br/> 17 Knee<br/> 18 Lower leg<br/> 19 Ankle<br/> 20 Foot<br/> 21 Abdomen<br/> 22 Other .....</p> </td> <td style="width: 33%;"></td> </tr> </table>                                                                                                                                                                                                                                                                                                                                                                                                                                                                                                                                                                                                                                                                                                  |                                                                                                                                                                                                                                                                                                                                                                                                                                                                                                                                                                                                                                                                          | <p>1 Head/facial area<br/> 2 Temporo-mandibular<br/> 3 Neck<br/> 4 Shoulder<br/> 5 Upper arm<br/> 6 Elbow<br/> 7 Forearm<br/> 8 Wrist<br/> 9 Hand<br/> 10 Thoracic spine<br/> 11 Rib cage</p>                                                                                                                                                                                                                                                                                                                                                                                                    | <p>12 Lumbar<br/> 13 Sacroiliac/pelvis/groin<br/> 14 Gluteal region<br/> 15 Hip<br/> 16 Thigh/upper leg<br/> 17 Knee<br/> 18 Lower leg<br/> 19 Ankle<br/> 20 Foot<br/> 21 Abdomen<br/> 22 Other .....</p>                                                                                                                                                                                                                                                                                                                                                                                                                                                                |  |
| <p>1 Head/facial area<br/> 2 Temporo-mandibular<br/> 3 Neck<br/> 4 Shoulder<br/> 5 Upper arm<br/> 6 Elbow<br/> 7 Forearm<br/> 8 Wrist<br/> 9 Hand<br/> 10 Thoracic spine<br/> 11 Rib cage</p>                                                                                                                                                                                                                                                                                                                                                                                                                                                                                                                                                                                                                                                                                                                                                                                                                                                                                                                                                                                                                                                                                                                                                                                                                                                                                                                                                                                            | <p>12 Lumbar<br/> 13 Sacroiliac/pelvis/groin<br/> 14 Gluteal region<br/> 15 Hip<br/> 16 Thigh/upper leg<br/> 17 Knee<br/> 18 Lower leg<br/> 19 Ankle<br/> 20 Foot<br/> 21 Abdomen<br/> 22 Other .....</p>                                                                                                                                                                                                                                                                                                                                                                                                                                                                |                                                                                                                                                                                                                                                                                                                                                                                                                                                                                                                                                                                                  |                                                                                                                                                                                                                                                                                                                                                                                                                                                                                                                                                                                                                                                                          |  |
| <p><b>27. Is this the first episode?</b> <i>Please tick</i></p> <p><input type="checkbox"/> Yes, first time onset<br/> <input type="checkbox"/> Second episode<br/> <input type="checkbox"/> Third episode<br/> <input type="checkbox"/> Fourth or more episodes</p>                                                                                                                                                                                                                                                                                                                                                                                                                                                                                                                                                                                                                                                                                                                                                                                                                                                                                                                                                                                                                                                                                                                                                                                                                                                                                                                     | <p><b>28. What investigations have taken place for this current problem?</b> <i>Tick all that apply</i></p> <p><input type="checkbox"/> None<br/> <input type="checkbox"/> Blood test<br/> <input type="checkbox"/> X-Ray<br/> <input type="checkbox"/> CT Scan<br/> <input type="checkbox"/> MRI<br/> <input type="checkbox"/> Ultrasound scan<br/> <input type="checkbox"/> Urinalysis<br/> <input type="checkbox"/> Other (please state)</p>                                                                                                                                                                                                                          |                                                                                                                                                                                                                                                                                                                                                                                                                                                                                                                                                                                                  |                                                                                                                                                                                                                                                                                                                                                                                                                                                                                                                                                                                                                                                                          |  |
| <p><b>29. What current co-existing conditions (diagnosed by a medical practitioner) does the patient have (tick all that apply)</b></p> <table style="width: 100%; border: none;"> <tr> <td style="width: 50%; vertical-align: top;"> <p><input type="checkbox"/> Anaemia<br/> <input type="checkbox"/> Angina<br/> <input type="checkbox"/> Anxiety<br/> <input type="checkbox"/> Arthritis<br/> <input type="checkbox"/> Asthma<br/> <input type="checkbox"/> Bowel disease<br/> <input type="checkbox"/> Cancer<br/> <input type="checkbox"/> COPD (chronic obstructive pulmonary disease)<br/> <input type="checkbox"/> CHF (Congestive heart failure)<br/> <input type="checkbox"/> Dementia<br/> <input type="checkbox"/> Depression<br/> <input type="checkbox"/> Diabetes<br/> <input type="checkbox"/> Hearing impairment</p> </td> <td style="width: 50%; vertical-align: top;"> <p><input type="checkbox"/> Hypertension<br/> <input type="checkbox"/> Kidney disease<br/> <input type="checkbox"/> Liver disease<br/> <input type="checkbox"/> Migraine<br/> <input type="checkbox"/> MI (myocardial infarct)<br/> <input type="checkbox"/> Neurological disease<br/> <input type="checkbox"/> Osteoporosis<br/> <input type="checkbox"/> Peripheral vascular disease<br/> <input type="checkbox"/> Pregnancy<br/> <input type="checkbox"/> Stroke/TIA (Transient Ischaemic Attack)<br/> <input type="checkbox"/> Upper gastrointestinal disease<br/> <input type="checkbox"/> Visual impairment<br/> <input type="checkbox"/> Other (please state)</p> </td> </tr> </table> |                                                                                                                                                                                                                                                                                                                                                                                                                                                                                                                                                                                                                                                                          | <p><input type="checkbox"/> Anaemia<br/> <input type="checkbox"/> Angina<br/> <input type="checkbox"/> Anxiety<br/> <input type="checkbox"/> Arthritis<br/> <input type="checkbox"/> Asthma<br/> <input type="checkbox"/> Bowel disease<br/> <input type="checkbox"/> Cancer<br/> <input type="checkbox"/> COPD (chronic obstructive pulmonary disease)<br/> <input type="checkbox"/> CHF (Congestive heart failure)<br/> <input type="checkbox"/> Dementia<br/> <input type="checkbox"/> Depression<br/> <input type="checkbox"/> Diabetes<br/> <input type="checkbox"/> Hearing impairment</p> | <p><input type="checkbox"/> Hypertension<br/> <input type="checkbox"/> Kidney disease<br/> <input type="checkbox"/> Liver disease<br/> <input type="checkbox"/> Migraine<br/> <input type="checkbox"/> MI (myocardial infarct)<br/> <input type="checkbox"/> Neurological disease<br/> <input type="checkbox"/> Osteoporosis<br/> <input type="checkbox"/> Peripheral vascular disease<br/> <input type="checkbox"/> Pregnancy<br/> <input type="checkbox"/> Stroke/TIA (Transient Ischaemic Attack)<br/> <input type="checkbox"/> Upper gastrointestinal disease<br/> <input type="checkbox"/> Visual impairment<br/> <input type="checkbox"/> Other (please state)</p> |  |
| <p><input type="checkbox"/> Anaemia<br/> <input type="checkbox"/> Angina<br/> <input type="checkbox"/> Anxiety<br/> <input type="checkbox"/> Arthritis<br/> <input type="checkbox"/> Asthma<br/> <input type="checkbox"/> Bowel disease<br/> <input type="checkbox"/> Cancer<br/> <input type="checkbox"/> COPD (chronic obstructive pulmonary disease)<br/> <input type="checkbox"/> CHF (Congestive heart failure)<br/> <input type="checkbox"/> Dementia<br/> <input type="checkbox"/> Depression<br/> <input type="checkbox"/> Diabetes<br/> <input type="checkbox"/> Hearing impairment</p>                                                                                                                                                                                                                                                                                                                                                                                                                                                                                                                                                                                                                                                                                                                                                                                                                                                                                                                                                                                         | <p><input type="checkbox"/> Hypertension<br/> <input type="checkbox"/> Kidney disease<br/> <input type="checkbox"/> Liver disease<br/> <input type="checkbox"/> Migraine<br/> <input type="checkbox"/> MI (myocardial infarct)<br/> <input type="checkbox"/> Neurological disease<br/> <input type="checkbox"/> Osteoporosis<br/> <input type="checkbox"/> Peripheral vascular disease<br/> <input type="checkbox"/> Pregnancy<br/> <input type="checkbox"/> Stroke/TIA (Transient Ischaemic Attack)<br/> <input type="checkbox"/> Upper gastrointestinal disease<br/> <input type="checkbox"/> Visual impairment<br/> <input type="checkbox"/> Other (please state)</p> |                                                                                                                                                                                                                                                                                                                                                                                                                                                                                                                                                                                                  |                                                                                                                                                                                                                                                                                                                                                                                                                                                                                                                                                                                                                                                                          |  |

## Part 2: Management and treatment

### First appointment

30. Was this patient suitable for osteopathic treatment? Yes  No

### 31. What types of treatment approaches have been used with the patient today?

- |                                                                                                                                                                                                                                                                                                                                                                                                                                                     |                                                                                                                                                                                                                                                                                                                                                                                           |
|-----------------------------------------------------------------------------------------------------------------------------------------------------------------------------------------------------------------------------------------------------------------------------------------------------------------------------------------------------------------------------------------------------------------------------------------------------|-------------------------------------------------------------------------------------------------------------------------------------------------------------------------------------------------------------------------------------------------------------------------------------------------------------------------------------------------------------------------------------------|
| <input type="checkbox"/> No treatment<br><input type="checkbox"/> Soft tissue<br><input type="checkbox"/> Articulation<br><input type="checkbox"/> HVLA thrust<br><input type="checkbox"/> Cranial techniques<br><input type="checkbox"/> Muscle energy<br><input type="checkbox"/> Strain/counterstrain<br><input type="checkbox"/> Functional technique<br><input type="checkbox"/> Visceral<br><input type="checkbox"/> Myofascial release (MFR) | <input type="checkbox"/> Education<br><input type="checkbox"/> Relaxation advice<br><input type="checkbox"/> Steroid Injection<br><input type="checkbox"/> Acupuncture<br><input type="checkbox"/> Dietary advice<br><input type="checkbox"/> Exercise<br><input type="checkbox"/> Orthotics<br><input type="checkbox"/> Lifestyle advice<br><input type="checkbox"/> Other (please name) |
|-----------------------------------------------------------------------------------------------------------------------------------------------------------------------------------------------------------------------------------------------------------------------------------------------------------------------------------------------------------------------------------------------------------------------------------------------------|-------------------------------------------------------------------------------------------------------------------------------------------------------------------------------------------------------------------------------------------------------------------------------------------------------------------------------------------------------------------------------------------|

### 32. Was informed consent obtained for any particular technique used?

Yes   
 Technique (*Please state*)  
 .....  
 No   
 Not applicable

### 33. How was consent gained from the patient about osteopathic examination and treatment? (*Tick all that apply*)

- Implied consent  
 Verbally  
 Written  
 Written and verbal  
 Not applicable  
 Other

### 34. Has information concerning the following been discussed with the patient?

Possible risks of examination and treatment      Yes  No   
 Possible side-effects of treatment                      Yes  No

### 35. What other education and advice have been given to the patient to inform them about their condition? *Please record all that apply*

- Explanation of presenting problem  
 Possible risk factors associated with a recurrence of symptoms  
 Anticipated response to treatment  
 Anticipated number of treatments  
 Not applicable

### 36. What self-management strategies have been recommended for the patient to use? \* *Please tick all that apply*

- |                                                                                                                                                                                                                                                                                                                                                  |                                                                                                                                                                                                                                                                                                                                                                                                |
|--------------------------------------------------------------------------------------------------------------------------------------------------------------------------------------------------------------------------------------------------------------------------------------------------------------------------------------------------|------------------------------------------------------------------------------------------------------------------------------------------------------------------------------------------------------------------------------------------------------------------------------------------------------------------------------------------------------------------------------------------------|
| <input type="checkbox"/> None<br><input type="checkbox"/> Application of heat<br><input type="checkbox"/> Application of cold<br><input type="checkbox"/> Stretches<br><input type="checkbox"/> Rest<br><input type="checkbox"/> Specific exercise<br><input type="checkbox"/> General exercise<br><input type="checkbox"/> Other (please state) | <input type="checkbox"/> Vitamin or other nutritional supplements<br><input type="checkbox"/> Postural exercises/advice<br><input type="checkbox"/> Natural remedies<br><input type="checkbox"/> Relaxation advice<br><input type="checkbox"/> Advice concerning physical activity<br><input type="checkbox"/> Homeopathic or Naturopathic remedies<br><input type="checkbox"/> Other<br>..... |
|--------------------------------------------------------------------------------------------------------------------------------------------------------------------------------------------------------------------------------------------------------------------------------------------------------------------------------------------------|------------------------------------------------------------------------------------------------------------------------------------------------------------------------------------------------------------------------------------------------------------------------------------------------------------------------------------------------------------------------------------------------|

|                                                                                                                                                                                                                                                                                                                                                                                                                                                                                                                                                                                                                                                                                                                                                                                                                                                                                                                                                                                                                                                                                 |                                                                                                                                                                                                                                                                                                                                                                                                                                              |                                                                                                                                                                                                                                                                                                                                                                                                                                |                                                                                                                                                                                                                                                                                                                                              |
|---------------------------------------------------------------------------------------------------------------------------------------------------------------------------------------------------------------------------------------------------------------------------------------------------------------------------------------------------------------------------------------------------------------------------------------------------------------------------------------------------------------------------------------------------------------------------------------------------------------------------------------------------------------------------------------------------------------------------------------------------------------------------------------------------------------------------------------------------------------------------------------------------------------------------------------------------------------------------------------------------------------------------------------------------------------------------------|----------------------------------------------------------------------------------------------------------------------------------------------------------------------------------------------------------------------------------------------------------------------------------------------------------------------------------------------------------------------------------------------------------------------------------------------|--------------------------------------------------------------------------------------------------------------------------------------------------------------------------------------------------------------------------------------------------------------------------------------------------------------------------------------------------------------------------------------------------------------------------------|----------------------------------------------------------------------------------------------------------------------------------------------------------------------------------------------------------------------------------------------------------------------------------------------------------------------------------------------|
| <p><b>37. Who is responsible for payment for treatment *</b></p> <p><input type="checkbox"/> Self<br/> <input type="checkbox"/> Insurance company<br/> <input type="checkbox"/> Employer/own company<br/> <input type="checkbox"/> Other (please state)</p>                                                                                                                                                                                                                                                                                                                                                                                                                                                                                                                                                                                                                                                                                                                                                                                                                     | <p><b>38. Is an insurance case or litigation claim pending?</b></p> <p>Yes <input type="checkbox"/> No <input type="checkbox"/></p>                                                                                                                                                                                                                                                                                                          |                                                                                                                                                                                                                                                                                                                                                                                                                                |                                                                                                                                                                                                                                                                                                                                              |
| <p><b>39. Time allocated for first appointment _____ minutes</b></p>                                                                                                                                                                                                                                                                                                                                                                                                                                                                                                                                                                                                                                                                                                                                                                                                                                                                                                                                                                                                            |                                                                                                                                                                                                                                                                                                                                                                                                                                              |                                                                                                                                                                                                                                                                                                                                                                                                                                |                                                                                                                                                                                                                                                                                                                                              |
| <p><b>Second and subsequent appointments</b></p>                                                                                                                                                                                                                                                                                                                                                                                                                                                                                                                                                                                                                                                                                                                                                                                                                                                                                                                                                                                                                                |                                                                                                                                                                                                                                                                                                                                                                                                                                              |                                                                                                                                                                                                                                                                                                                                                                                                                                |                                                                                                                                                                                                                                                                                                                                              |
| <p><b>40. After the <u>first</u> appointment, did the patient report any of the known complications of treatment described below within the first 24-48 hours?</b></p> <p><input type="checkbox"/> None of these<br/> <input type="checkbox"/> Increased pain<br/> <input type="checkbox"/> Increased stiffness<br/> <input type="checkbox"/> Dizziness<br/> <input type="checkbox"/> Nausea<br/> <input type="checkbox"/> Headache<br/> <input type="checkbox"/> Fatigue<br/> <input type="checkbox"/> Serious adverse event, if known, please describe below</p>                                                                                                                                                                                                                                                                                                                                                                                                                                                                                                              | <p><b>41. What was the patient's overall outcome after the <u>first</u> appointment?*</b></p> <p><input type="checkbox"/> Worst ever<br/> <input type="checkbox"/> Much worse<br/> <input type="checkbox"/> Worse<br/> <input type="checkbox"/> Not improved/not worse<br/> <input type="checkbox"/> Improved<br/> <input type="checkbox"/> Much improved<br/> <input type="checkbox"/> Best ever<br/> <input type="checkbox"/> Resolved</p> |                                                                                                                                                                                                                                                                                                                                                                                                                                |                                                                                                                                                                                                                                                                                                                                              |
| <p><b>42. What types of treatment approaches have been used with the patient? <i>Please tick all that apply</i></b></p> <table border="0" style="width: 100%;"> <tr> <td style="vertical-align: top;"> <input type="checkbox"/> No treatment<br/> <input type="checkbox"/> Soft tissue<br/> <input type="checkbox"/> Articulation<br/> <input type="checkbox"/> HVLA thrust<br/> <input type="checkbox"/> Cranial<br/> <input type="checkbox"/> Muscle energy<br/> <input type="checkbox"/> Strain/counterstrain<br/> <input type="checkbox"/> Functional<br/> <input type="checkbox"/> Visceral<br/> <input type="checkbox"/> Myofascial release (MFR) </td> <td style="vertical-align: top;"> <input type="checkbox"/> Education<br/> <input type="checkbox"/> Relaxation advice<br/> <input type="checkbox"/> Steroid Injection<br/> <input type="checkbox"/> Acupuncture<br/> <input type="checkbox"/> Dietary advice<br/> <input type="checkbox"/> Exercise<br/> <input type="checkbox"/> Orthotics<br/> <input type="checkbox"/> Other (please name) </td> </tr> </table> |                                                                                                                                                                                                                                                                                                                                                                                                                                              | <input type="checkbox"/> No treatment<br><input type="checkbox"/> Soft tissue<br><input type="checkbox"/> Articulation<br><input type="checkbox"/> HVLA thrust<br><input type="checkbox"/> Cranial<br><input type="checkbox"/> Muscle energy<br><input type="checkbox"/> Strain/counterstrain<br><input type="checkbox"/> Functional<br><input type="checkbox"/> Visceral<br><input type="checkbox"/> Myofascial release (MFR) | <input type="checkbox"/> Education<br><input type="checkbox"/> Relaxation advice<br><input type="checkbox"/> Steroid Injection<br><input type="checkbox"/> Acupuncture<br><input type="checkbox"/> Dietary advice<br><input type="checkbox"/> Exercise<br><input type="checkbox"/> Orthotics<br><input type="checkbox"/> Other (please name) |
| <input type="checkbox"/> No treatment<br><input type="checkbox"/> Soft tissue<br><input type="checkbox"/> Articulation<br><input type="checkbox"/> HVLA thrust<br><input type="checkbox"/> Cranial<br><input type="checkbox"/> Muscle energy<br><input type="checkbox"/> Strain/counterstrain<br><input type="checkbox"/> Functional<br><input type="checkbox"/> Visceral<br><input type="checkbox"/> Myofascial release (MFR)                                                                                                                                                                                                                                                                                                                                                                                                                                                                                                                                                                                                                                                  | <input type="checkbox"/> Education<br><input type="checkbox"/> Relaxation advice<br><input type="checkbox"/> Steroid Injection<br><input type="checkbox"/> Acupuncture<br><input type="checkbox"/> Dietary advice<br><input type="checkbox"/> Exercise<br><input type="checkbox"/> Orthotics<br><input type="checkbox"/> Other (please name)                                                                                                 |                                                                                                                                                                                                                                                                                                                                                                                                                                |                                                                                                                                                                                                                                                                                                                                              |
| <p><b>43. Was informed consent obtained for any particular technique used?</b></p> <p>Yes <input type="checkbox"/><br/> Technique (<i>Please state</i>)<br/> .....<br/> No <input type="checkbox"/><br/> Not applicable <input type="checkbox"/></p>                                                                                                                                                                                                                                                                                                                                                                                                                                                                                                                                                                                                                                                                                                                                                                                                                            | <p><b>44. How was consent gained from the patient about osteopathic examination and treatment? (<i>Tick all that apply</i>)</b></p> <p><input type="checkbox"/> Implied consent<br/> <input type="checkbox"/> Verbally<br/> <input type="checkbox"/> Written<br/> <input type="checkbox"/> Written and verbal<br/> <input type="checkbox"/> Not applicable<br/> <input type="checkbox"/> Other</p>                                           |                                                                                                                                                                                                                                                                                                                                                                                                                                |                                                                                                                                                                                                                                                                                                                                              |

**45. What other education and advice have been given to the patient to inform them about their condition?** *Please record all that apply*

- Explanation of presenting problem
- Possible risk factors associated with a recurrence of symptoms
- Anticipated response to treatment
- Anticipated number of treatments
- Not applicable

**46. What self-management strategies have been recommended for the patient to use?** *Please tick all that apply\**

- |                                               |                                                                   |
|-----------------------------------------------|-------------------------------------------------------------------|
| <input type="checkbox"/> None                 | <input type="checkbox"/> Vitamin or other nutritional supplements |
| <input type="checkbox"/> Application of heat  | <input type="checkbox"/> Postural exercises/advice                |
| <input type="checkbox"/> Application of cold  | <input type="checkbox"/> Natural remedies                         |
| <input type="checkbox"/> Stretches            | <input type="checkbox"/> Relaxation advice                        |
| <input type="checkbox"/> Rest                 | <input type="checkbox"/> Advice concerning physical activity      |
| <input type="checkbox"/> Specific exercise    | <input type="checkbox"/> Homeopathic or Naturopathic remedies     |
| <input type="checkbox"/> General exercise     | <input type="checkbox"/>                                          |
| <input type="checkbox"/> Other (please state) |                                                                   |

**47. Time allocated for follow up appointments** **minutes**

### Part 3: Final outcome report

**48. Date of final visit:**

**49. Did the patient continue to report any of the known complications of treatment described below after the second and subsequent appointments?**

- None of these
- Increased pain
- Increased stiffness
- Dizziness
- Nausea
- Headache
- Fatigue
- Serious adverse event, if known, please describe

**50. What was the patient's overall outcome at their final appointment or to date?**

- Worst ever
- Much worse
- Worse
- Not improved/not worse
- Improved
- Much improved
- Best ever
- Resolved

**51. How many treatments did it take to achieve this?**

**52. Did you contact the patient's GP during this course of treatment?**

- Yes since patient was referred to practice by GP
- Yes since GP had requested information
- Yes to request further information or investigation
- Yes for referral for other treatment
- No, the patient's GP was not contacted

**53. How many treatments did the patient have before being able to return to work (if applicable)?**

Treatments

- Not applicable

**54. What was the end result of the consultation period?\***

- No further treatment. The patient was discharged.
- Patient was recommended to return for episodic care (Maintenance).
- Patient was referred for further investigations pending treatment under the care of the practice.
- Patient was referred on
- The patient terminated treatment due to lack of further personal funds
- The patient terminated treatment due to lack of further funding by insurance providers
- The patient did not return – reason unknown
- The patient is still undergoing treatment for this condition at the end of the study period

**55. Was the patient referred on from the practice?** Yes  No

*If yes, where was the patient referred to? Tick one option.*

- Their GP for further investigations
- Their GP to try and arrange other treatment
- Another osteopath
- A homeopath
- An acupuncturist
- A podiatrist
- An Alexander teacher
- A physiotherapist
- A counsellor
- A chiropractor
- A sports massage therapist
- A Pilates trainer
- Other (please state)

***Thank you for completing this form***

**Statement of accreditation**

“This standardised data collection tool has been produced by the National Council for Osteopathic Research (NCOR), and funded by the General Osteopathic Council (GOsC), the UK regulator of osteopaths. The intellectual property rights in the standardised data collection tool are jointly owned by the NCOR and the GOsC. The tool should be referenced in published work as: Moore AP, Leach CMJ, Fawkes CA. Standardised data collection tool for osteopathic practice. National Council for Osteopathic Research (UK) and General Osteopathic Council UK, 2009”.

\*This tool has been modified with permission for use within Australia (Discipline of Osteopathy, RMIT University, Bundoora, April 2010)
